# Supplementary material
Source: publisher site journal article supplement (http://www.kjim.org/upload/media/kjim-2021-299-suppl6.pdf)
Supplement: Supplementary file 1 [file kjim-2021-299-suppl6.pdf]

**Supplementary Table 2. Peptide sequences of protein drugs**

| Protein                     | Peptide sequences                                                                                                                                                                                                                                                                                                                                                                                                                                                                                                                                                                                                                                                                                                                      |
|-----------------------------|----------------------------------------------------------------------------------------------------------------------------------------------------------------------------------------------------------------------------------------------------------------------------------------------------------------------------------------------------------------------------------------------------------------------------------------------------------------------------------------------------------------------------------------------------------------------------------------------------------------------------------------------------------------------------------------------------------------------------------------|
| Anti-CD25HC/IL-10/<br>CXCR3 | MATMGWSYIILFLVATAADVHSQLQQSGTVLARPGASVKMMSCKASGYSFTRYWMHWIKQRPQGQLEWIGAIYPGNS-DTSYNQKFEGKAKLTAVTSASTAYMELSSLTHEDSAVYYCSRDYGYFDFWGGQTTTLVSSASTKGPSVFPLAPSSKSTS-GGTAALGCLVKDYFPEPVTVSWNSGALTSVHTFPAVLQSSGLYSLSSVVTVPSSSLGTQTYICNVNHHKPSNTKVD-KRVEPPKSCDKTHTCPPCPAPELLGGPSVFLFPPKPKDTLMISRTPEVTCVVVDVSHEDPEVKFNWYVDGVEVHNAK-TKPREEQYNSTYRVVSVLTVLHQDWLNGKEYKCKVSNKALPAPIEKTISKAKGQPREPQVYTLPPSRDELTKNQVSLT-CLVKGFPYSDIAVEWESNGQPENNYKTTPPVLDSDGSFFLYSKLTVDKSRWQQGNVFCFSVMHEALHNHYTQKSLSL-SPGKGGGGSGGGGSSRGQYSREDNCTHFPVGGQSHMLLELRRTAFSQVKTFQTKDQLDNILLTDSLMDQ-FKGYLGCQALSEMIQFYLVVMPQAEKHGPEIKEHLNSLGEKLTLMRLRRCHRFLPCENKSKAVEQVKSDFNKLQD-QGVYKAMNEFDIFINCIEAYMMIKMKSGGGGGSGGGGSMVLEVSDHQVLNDAEVAALLENFSSSYDYGENESD-SCCTSPPCPQDFSLNFDGRS |
| Anti-CD25LC                 | MATMGWSYIILFLVATAADVHSQIVSTQSPAIMASAPGEKVTMTCSASSRSYMQWYQQKPGTSPKRWIYDTSK-LASGVPARFSGSGSGTSYSLTSSMEAEADAATYYCHQRSSYTFGGGKLEIKRTVAAPSVFIFPPSDEQLKSGTASVCLLN-NFYPREAKVQWKVDNALQSGNSQESVTEQDSKSTYLSSTLTLSKADYEKHKVYACEVTHQGLSSPVTKSFNRGEGS                                                                                                                                                                                                                                                                                                                                                                                                                                                                                                |

HC, heavy chain; IL-10, interleukin-10; CXCR3, C-X-C motif chemokine receptor 3; LC, light chain.
